# Supplementary material for: High-throughput sequencing identification of novel and conserved miRNAs in the Brassica oleracea leaves
Source: PubMed Central journal article supplement (PMC3840582; doi:10.1186/1471-2164-14-801), 2013-11-19

**bol-miR1885**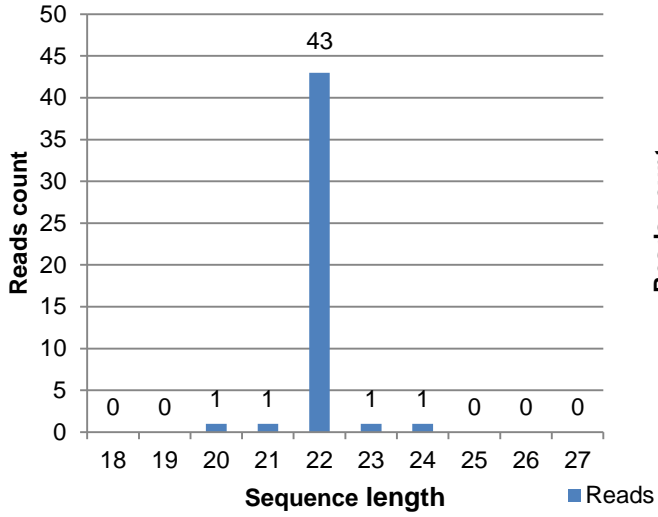**bol-miR397a**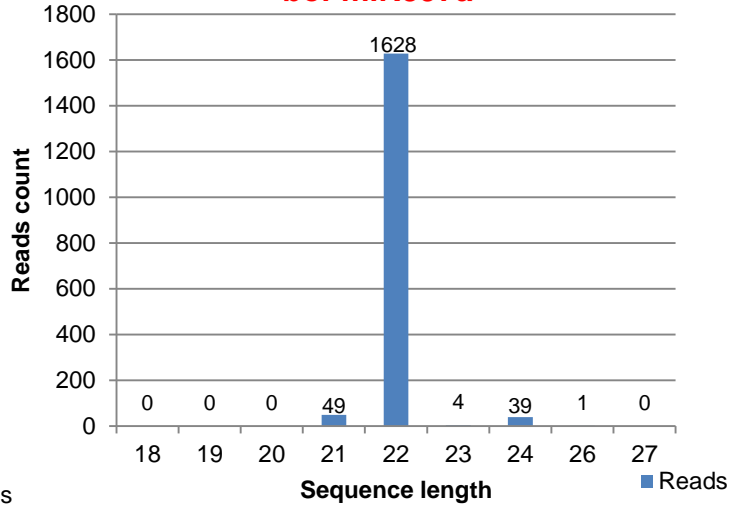**bol-miR403**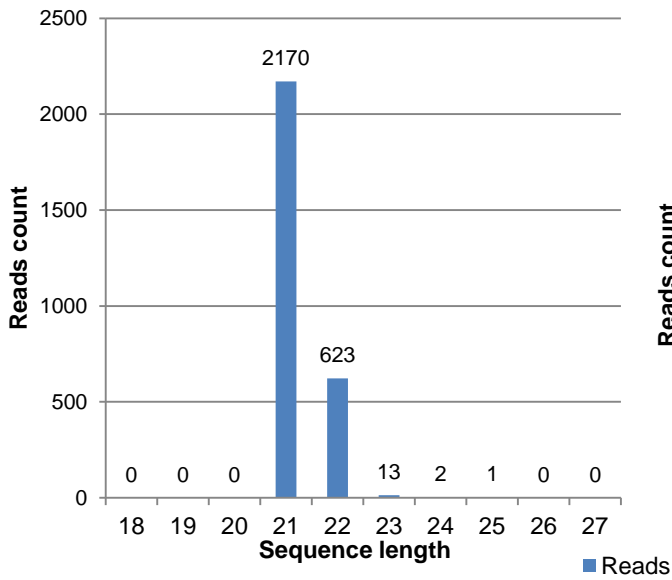**bol-miR166a**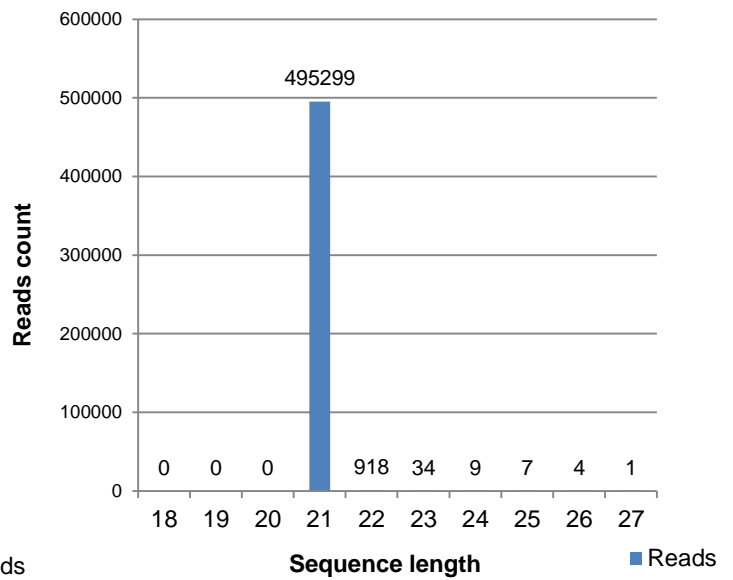**bol-miR167a**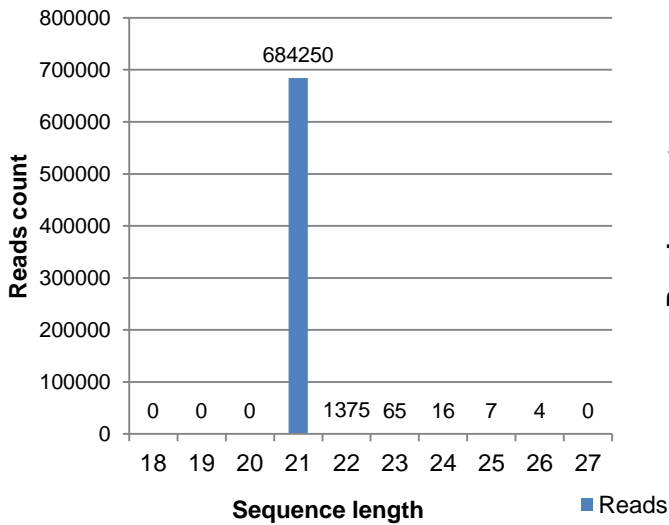**bol-miR157a**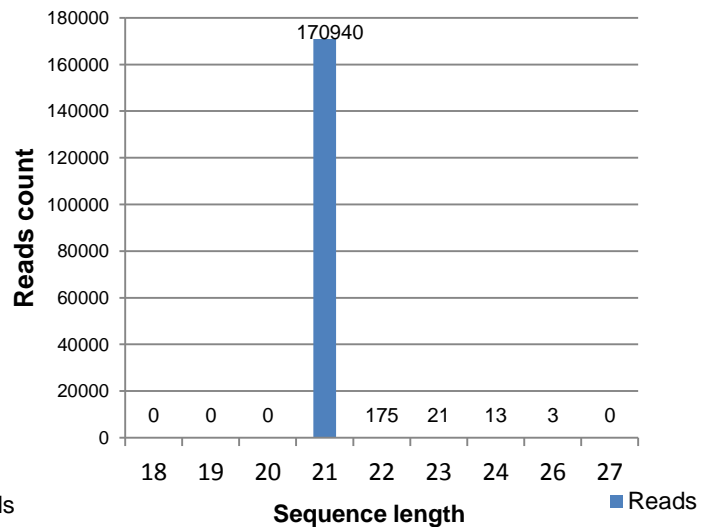

**bol-miR172a**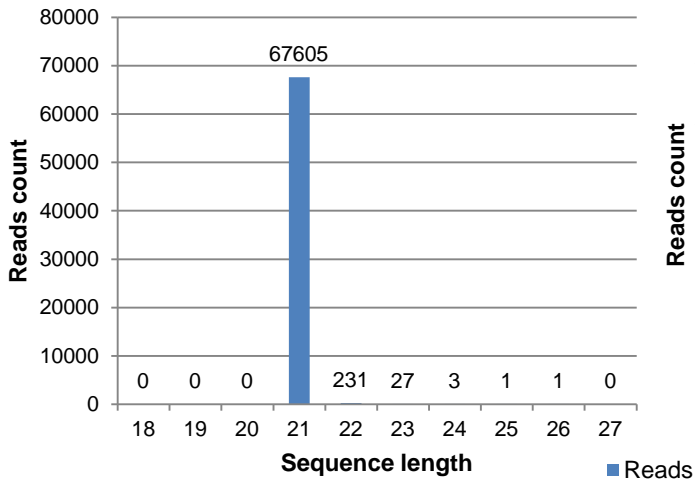**bol-miR168c**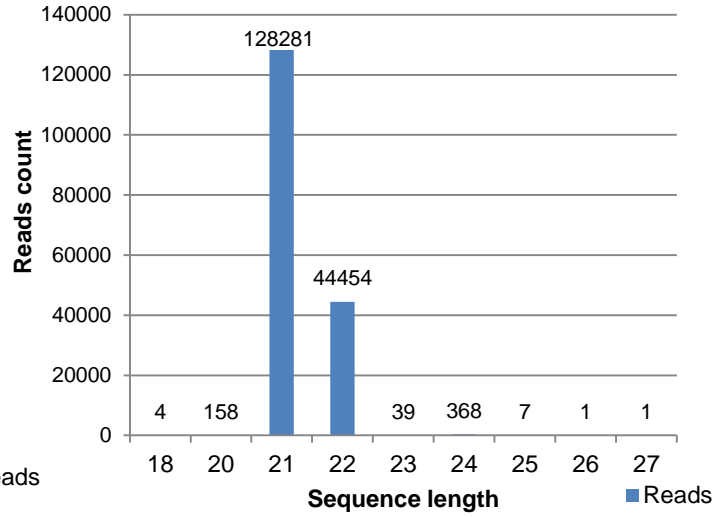**bol-miR9408**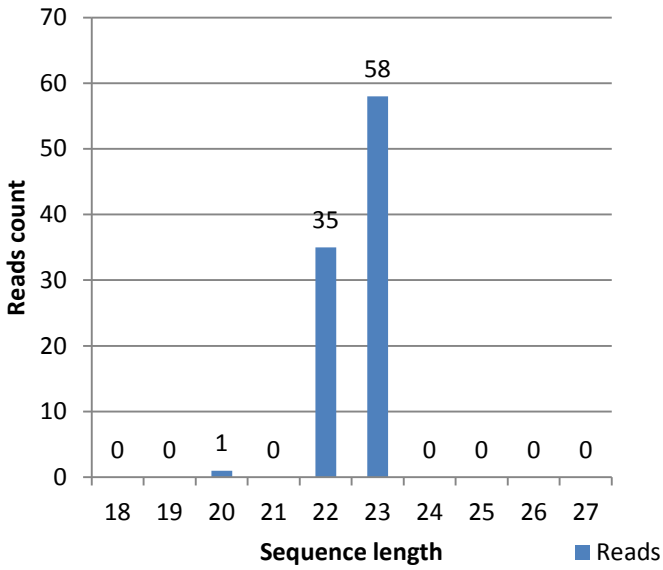**bol-miR9409**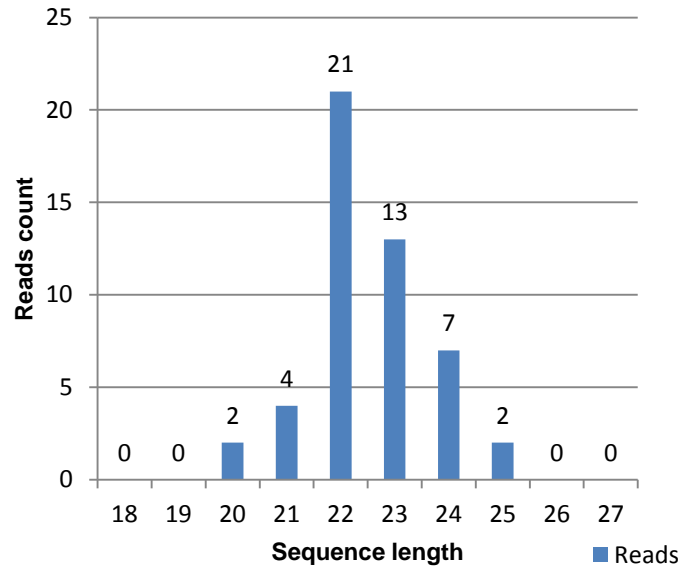**bol-miR9410**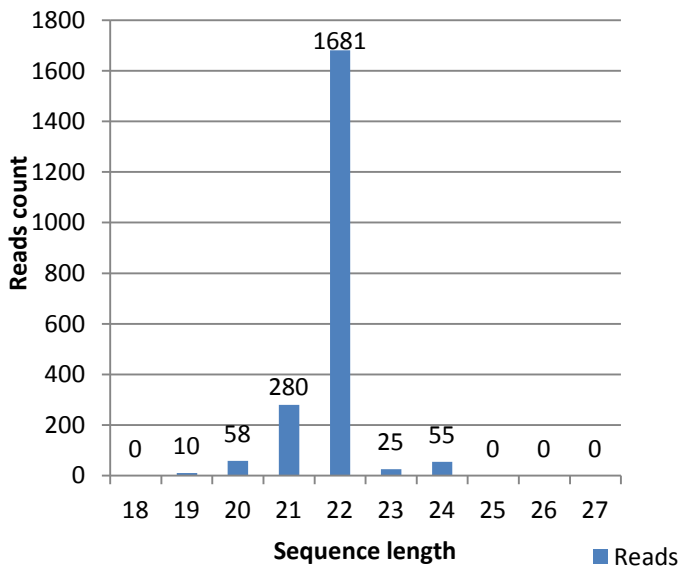**bol-miR9411**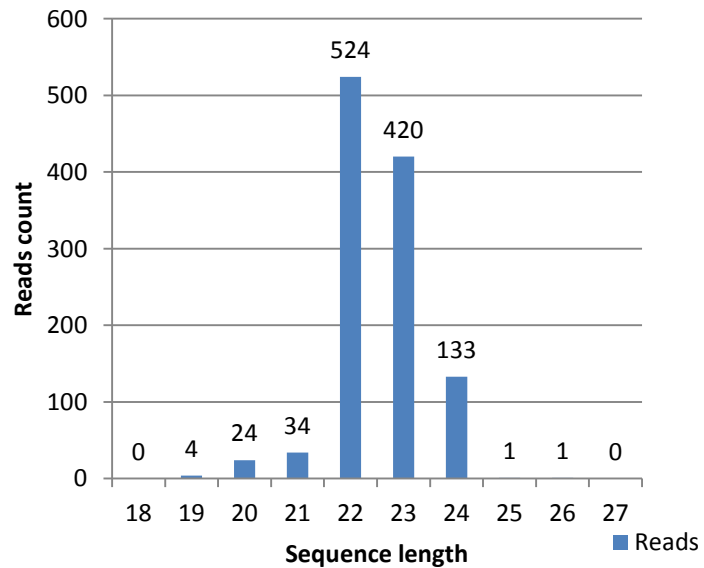

# bol-miR169k\*

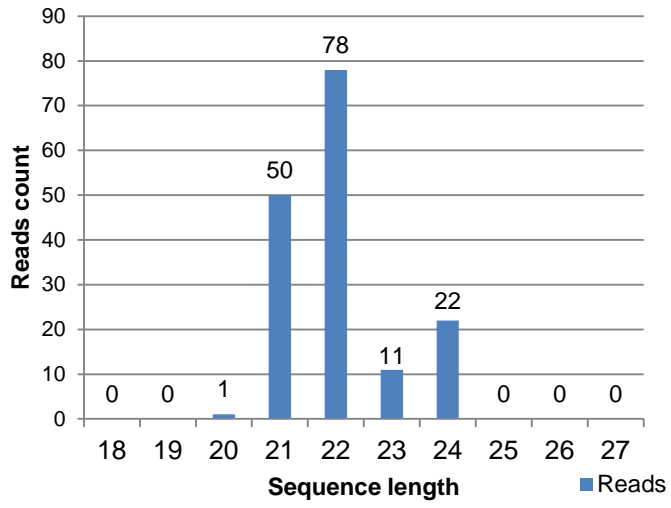

Supplement: 1471-2164-14-801-S2.pdf [file 1471-2164-14-801-S2.pdf]
