# Supplementary material for: High-throughput sequencing identification of novel and conserved miRNAs in the Brassica oleracea leaves
Source: PubMed Central journal article supplement (PMC3840582; doi:10.1186/1471-2164-14-801), 2013-11-19

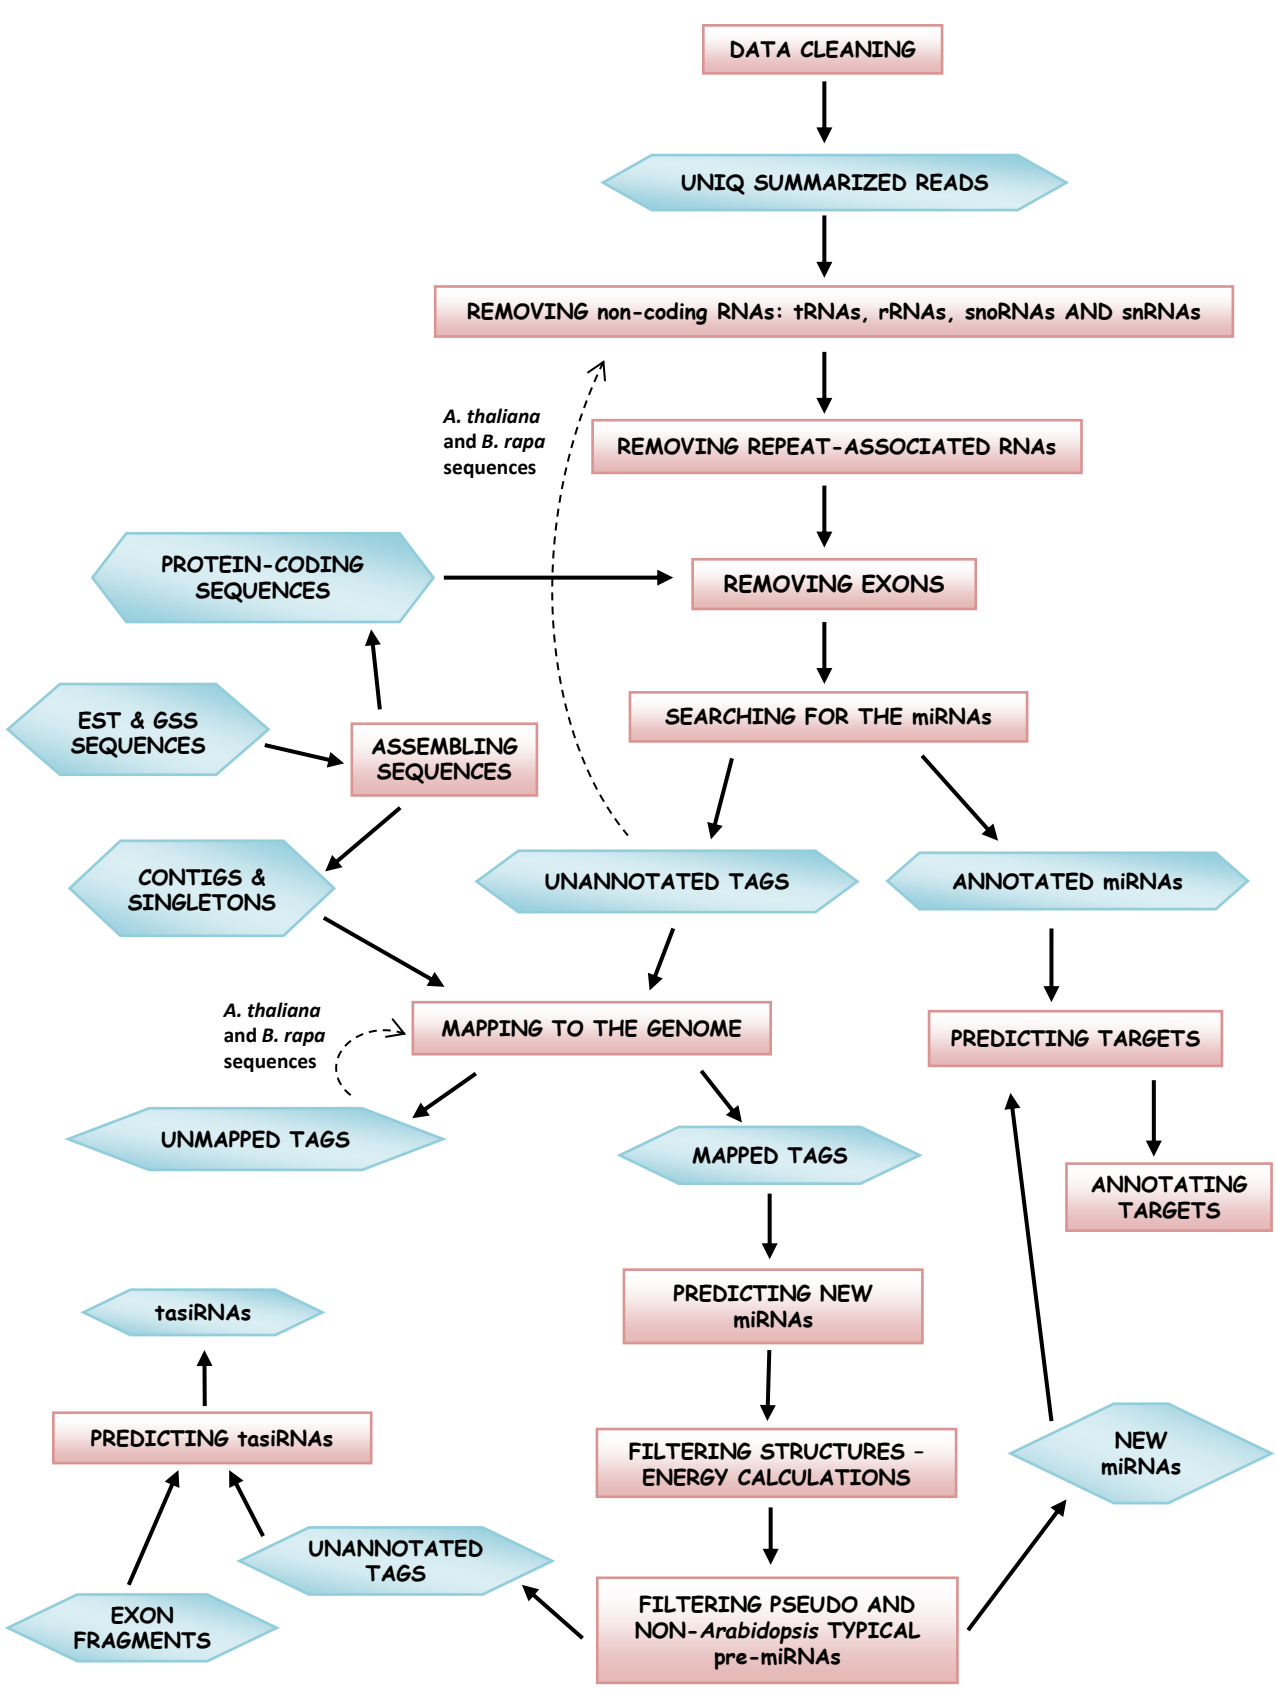

Supplement: 1471-2164-14-801-S3.pdf [file 1471-2164-14-801-S3.pdf]
